# Supplementary material for: Highly selective fluorimetric sensor for Cu2+and Hg2+using a benzothiazole-based receptor in semi-aqueous media and molecular docking studies
Source: Royal Society of Chemistry journal article supplement (doi:10.1039/c5ra03146j), 2015-01-01
Supplement: c5ra03146j1.pdf [file c5ra03146j1.pdf]

## -----Supporting Information-----

### Highly selective fluorometric sensing of Cu<sup>2+</sup> and Hg<sup>2+</sup> by using a benzothiazole based receptor in semi-aqueous medium and molecular docking studies

Yogesh B. Wagh<sup>1</sup>, Anil Kuwar<sup>1</sup>, Suban K. Sahoo<sup>2</sup>, Judith Gallucci<sup>3</sup>, Dipak S. Dalal\*<sup>1</sup>

<sup>1</sup> *School of Chemical Sciences, North Maharashtra University, Jalgaon-425001 (MS) India.*

<sup>2</sup> *Department of Applied Chemistry, SV National Institute Technology, Surat-395007 (Gujarat) India.*

<sup>3</sup> *Department of Chemistry and Biochemistry, Ohio State University, Columbus, OH 43210 USA.*

\*Corresponding Authors: Tel. +91-257-2257432, Fax +91-257-2258403, E-mail address:  
[dsdalal2007@gmail.com](mailto:dsdalal2007@gmail.com) (Dipak S. Dalal)

---

## Index

| Sr. no. | Content                                                                      | Figure no.                         | Page no. |
|---------|------------------------------------------------------------------------------|------------------------------------|----------|
| 1       | General information                                                          | -                                  | P2       |
| 2       | Synthesis and Characterization data for <b>1</b>                             | -                                  | P2-P3    |
| 3       | FT-IR, <sup>1</sup> H NMR, <sup>13</sup> CNMR and LC MS Spectra for <b>1</b> | <b>S1-4</b>                        | P4-P6    |
| 4       | Analytical parameters                                                        | <b>S5-S11</b>                      | P6-P10   |
| 5       | Docking Procedure                                                            | <b>S12</b>                         | P11      |
| 6       | Packing Structure and Crystal data for <b>1</b>                              | <b>S13</b>                         | P12-P21  |
| 7       | A comparison of literature reported solvent with present methodology         | <b>Table 1-7</b><br><b>Table 8</b> | P22      |

---

## General information

Melting points were measured in open capillary tubes and uncorrected. FT-IR spectra were obtained on Shimadzu IR-Affinity spectrometer (KBr Pellets). The <sup>1</sup>H NMR, <sup>13</sup>C NMR were recorded on FT NMR spectrometer model Avance - II (Bruker). The instrument is equipped with a cryomagnet of field strength 9.4 T. Its <sup>1</sup>H frequency is 400 and <sup>13</sup>C frequency is 100 MHz. NMR instrument uses a TMS as an internal standard and CDCl<sub>3</sub> as a solvent. Chemical shifts are given in parts per million (δ-scale) and the coupling constants are given in Hertz. Mass spectra were performed on an Ultima Global spectrometer with an ESI source. Silica gel (60–120 mesh size) was used for the column chromatography and silica gel-G plates (Merck) were used for TLC analysis with a mixture of acetone in n-hexane (10%) as the eluent. 2-Amino benzothiazole and DEAD were obtained from Sigma-Aldrich chemical company and were used without further purification.

## Synthesis of *(Z)*-ethyl 2-((*Z*)-2-(benzo[d]thiazol-2-ylimino)-4-oxo-3-phenylthiazolidin-5-ylidene) acetate) (1)

To a magnetically stirred solution of 1-(benzo[d]thiazol-2-yl)-3-phenylthiourea (2 mmol) and ethanol (5 mL) in 10 mL round bottom flask, diethyl acetylenedicarboxylates (2 mmol) was added drop wise at room temperature. The progress of reaction was monitored by TLC (hexane: acetone, 9:1 ratio), during which solid appears into the solution. After completion of reaction, the excess solvent was removed under reduced pressure and the residue was recrystallized from ethanol and few drops of water affording desired product as pale yellow crystals. Yield- 91.0%, m.p. 216-218 °C.

### Spectral Data

**IR (KBr,  $\text{cm}^{-1}$ ):** 3063, 2981, 1723, 1693, 1598, 1569, 1493, 1429, 1376, 1318, 1198, 1141, 1018, 879, 759, 736, 690, 566;

**$^1\text{H}$  NMR (400 MHz,  $\text{CDCl}_3$ ):**  $\delta$ (ppm); 1.39 (t, 3H,  $J = 7.12$  Hz), 4.36 (q, 2H,  $J = 7.12$  Hz), 7.07 (s, 1H, C=CH), 7.29-7.33 (m, 1H, ArH), 7.37-7.39 (m, 2H, ArH) 7.43-7.57 (m, 4H, ArH), 7.76 (d, 1H, ArH,  $J = 8.04$  Hz), 7.98 (d, 1H, ArH,  $J = 8.12$  Hz);

**$^{13}\text{C}$  NMR (100 MHz,  $\text{CDCl}_3$ ):**  $\delta$ (ppm); 14.20, 62.0, 119.61, 121.41, 122.81, 124.67, 126.33, 127.97, 129.38, 133.83, 134.71, 141.67, 151.06, 158.28, 164.7, 165.6, 167.5;

**LC-MS ( $m/z$ ) = 432.1 [M + Na] $^+$  100%.**

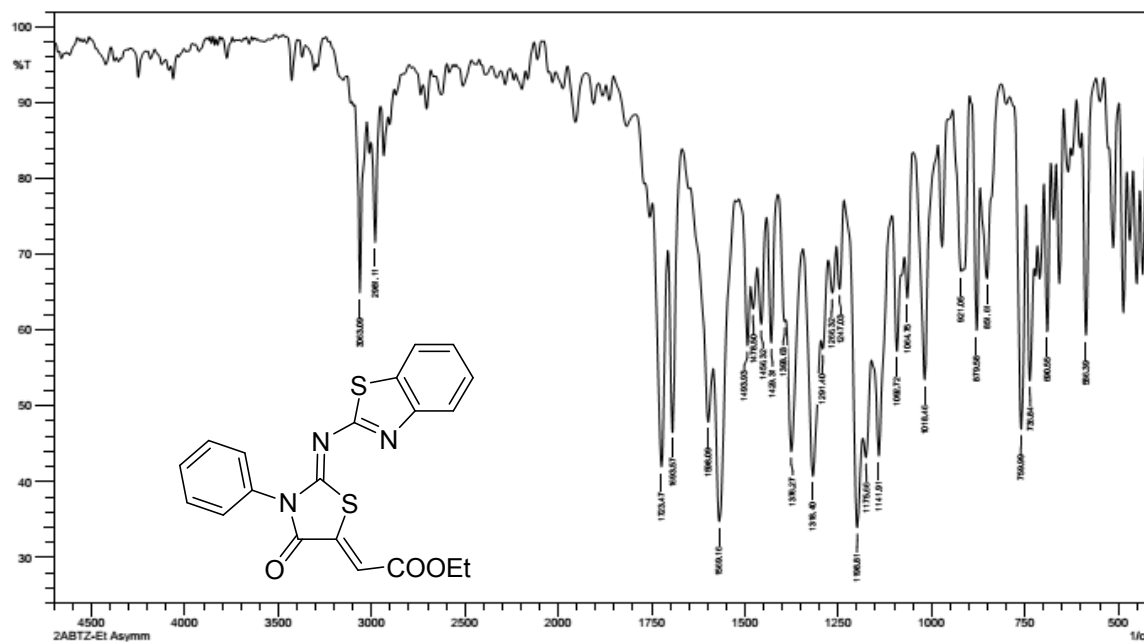

Comment;  
2ABTZ-Et Asymm

No. of Scans;  
Resolution;  
Apodization;

Date/Time; 28/12/2013 5:49:50 PM

User; Admin

Figure S1. IR spectra of receptor 1

GP-50

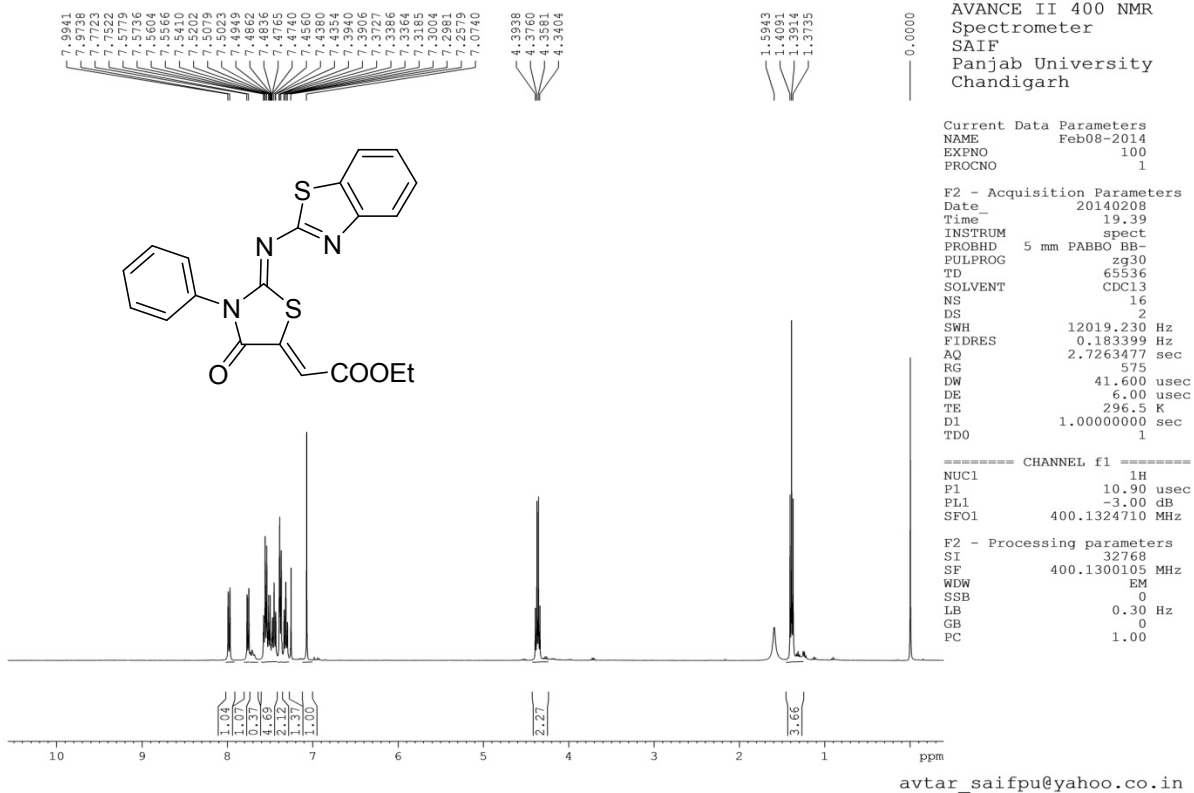

GP-50

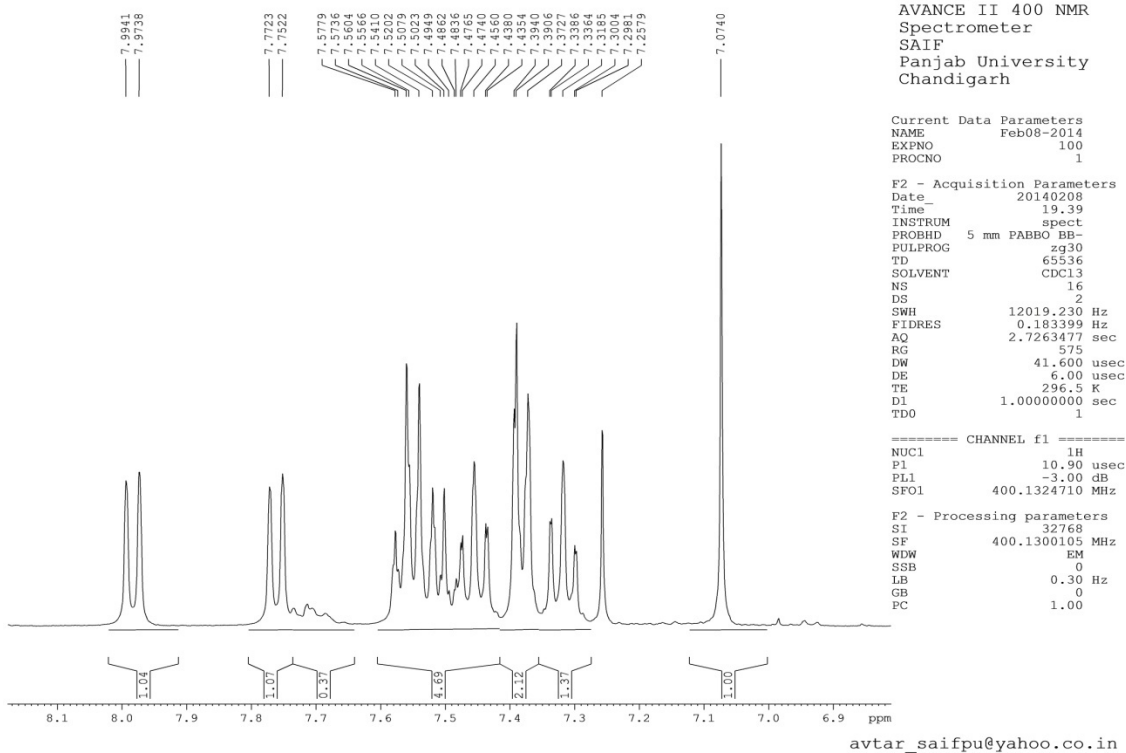

Figure S2. <sup>1</sup>H-NMR spectra of receptor 1

GP-50

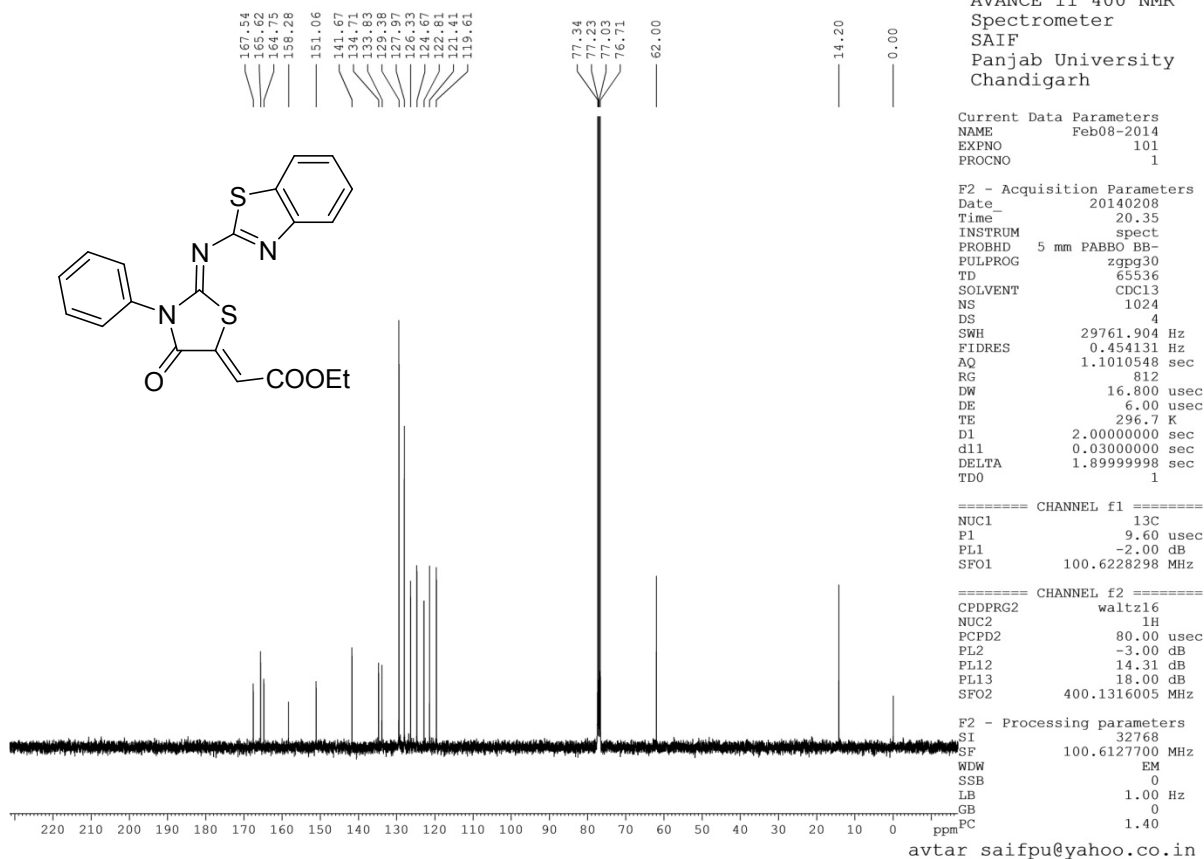

Figure S3. <sup>13</sup>C-NMR spectra of receptor 1

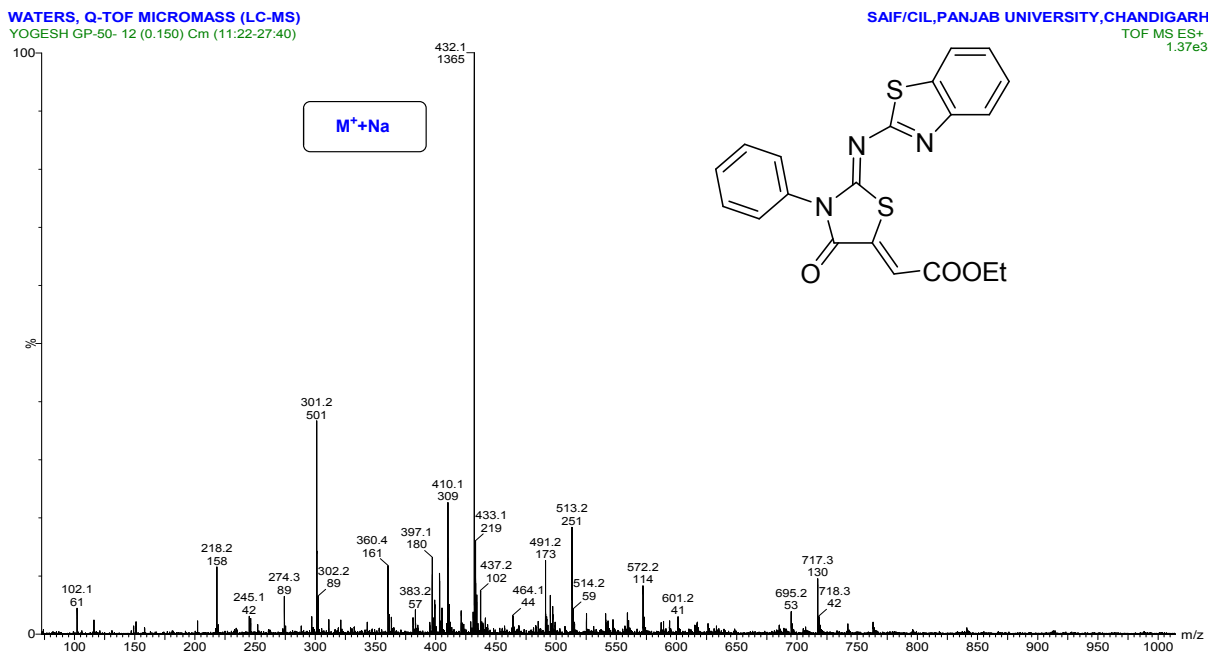

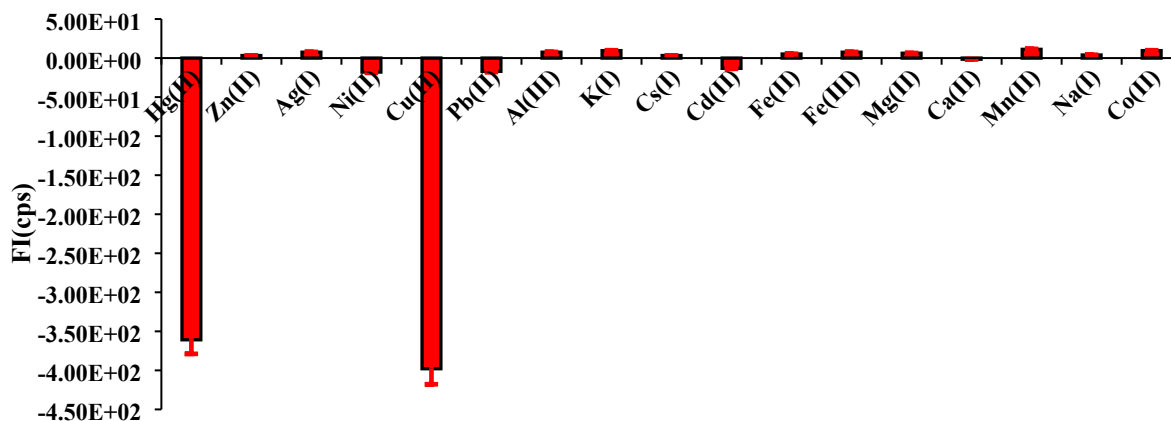

**Figure S5** Fluorescence ratio metric response of receptor **1** ( $c = 1 \times 10^{-5}$  M) upon the addition of a particular cations ( $c = 1 \times 10^{-4}$  M) in CH<sub>3</sub>OH /H<sub>2</sub>O (50:50, v/v).

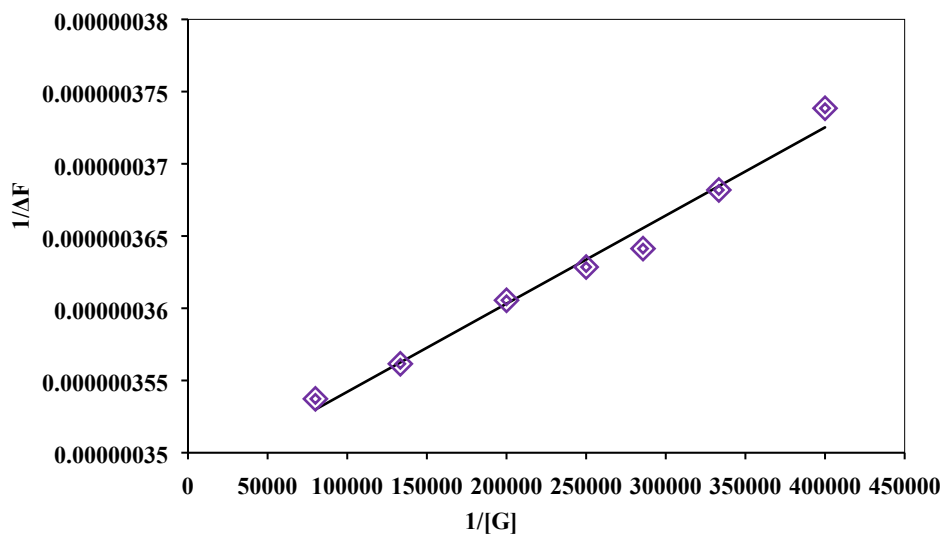

**Figure S6** Benesi-Hildebrand Plot receptor **1** (adjusted equation:  $1/F - F_0 = -2E-13x-3E-07$   $1/[G]$ ),  $R=0.944$ ) at the K value  $5.70 \times 10^6$  M<sup>-1</sup> for Cu<sup>2+</sup>.

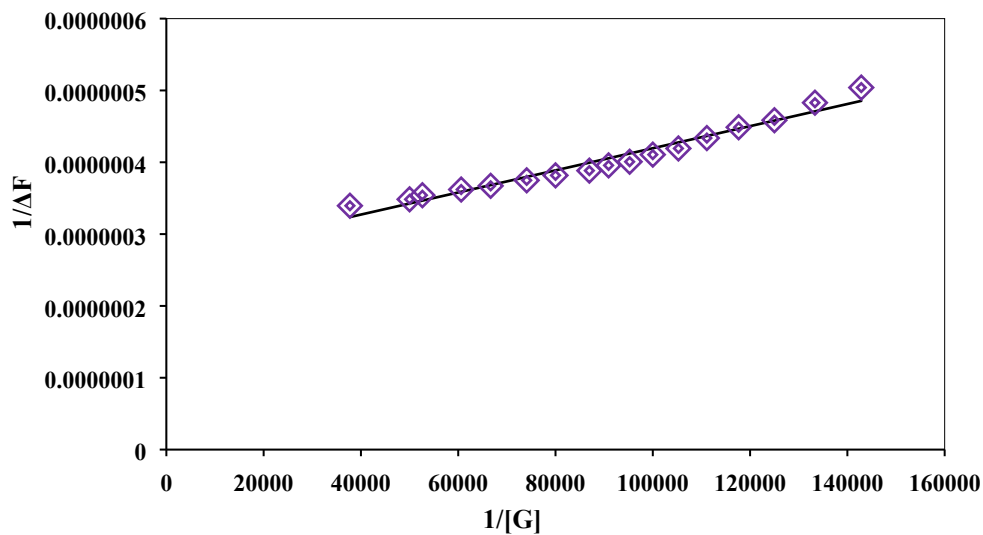

**Figure S7** Benesi-Hildebrand Plot receptor **1** (adjusted equation:  $1/F - F_0 = -8E-12x + 7E-07 1/[G]$ ,  $R=0.977$ ) at the  $K$  value  $1.73 \times 10^5 M^{-1}$  for  $Hg^{2+}$ .

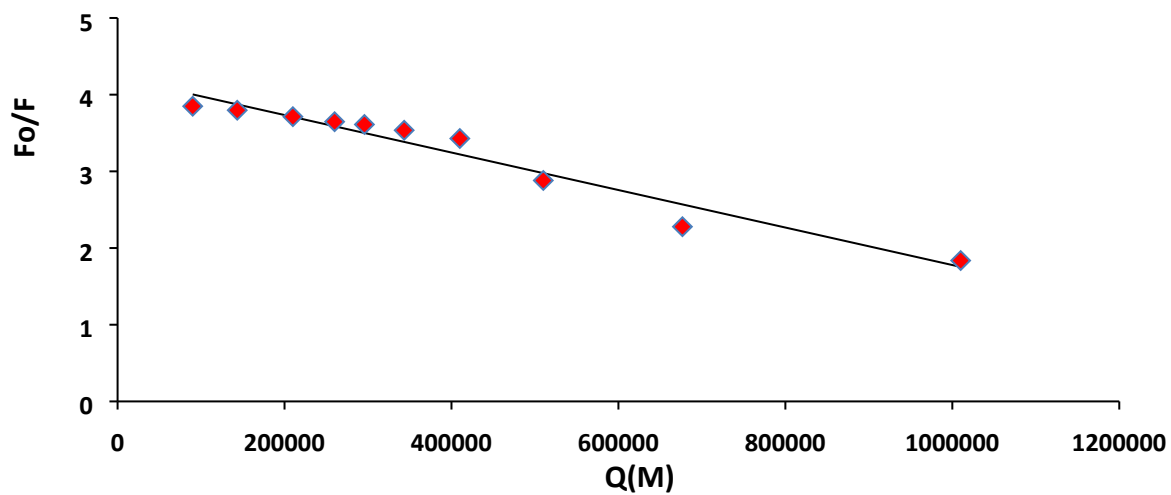

**Figure S8** Stern-Volmer plots for titrations of receptor **1** with different concentrations of  $Cu^{2+}$  metal salt.



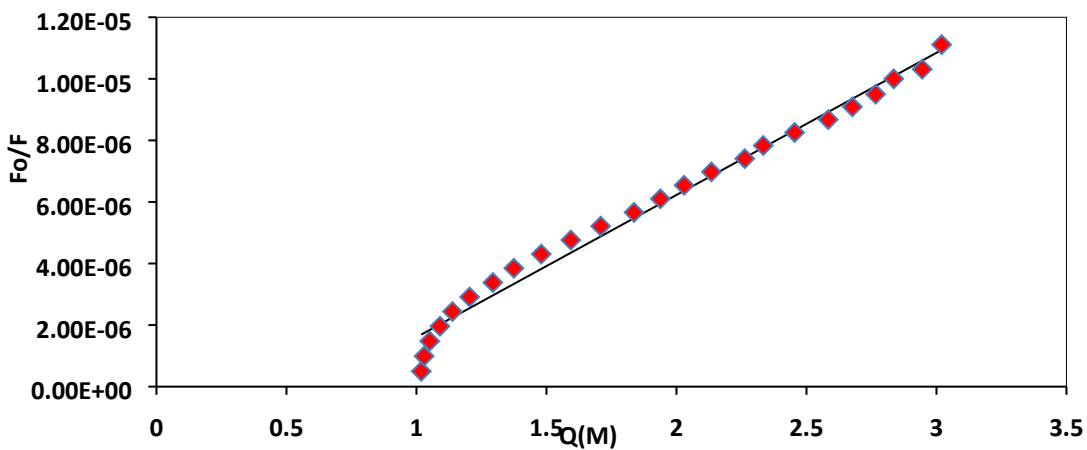

**Figure S9** Stern–Volmer plots for titrations of receptor **1** with different concentrations of Hg<sup>2+</sup> metal salt.

JOB PLOT

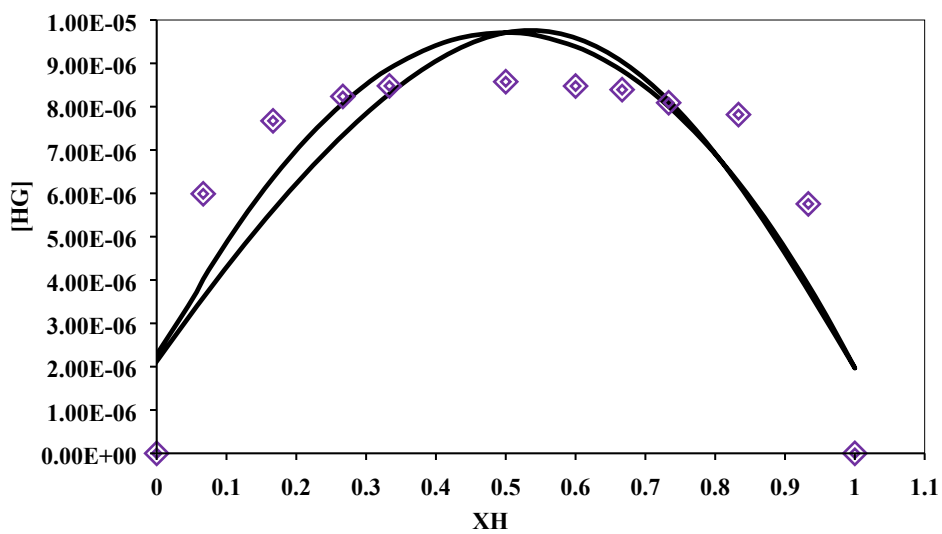

**Figure S10** Job plots for titrations of receptor **1** with different concentrations of Cu<sup>2+</sup> metal salt

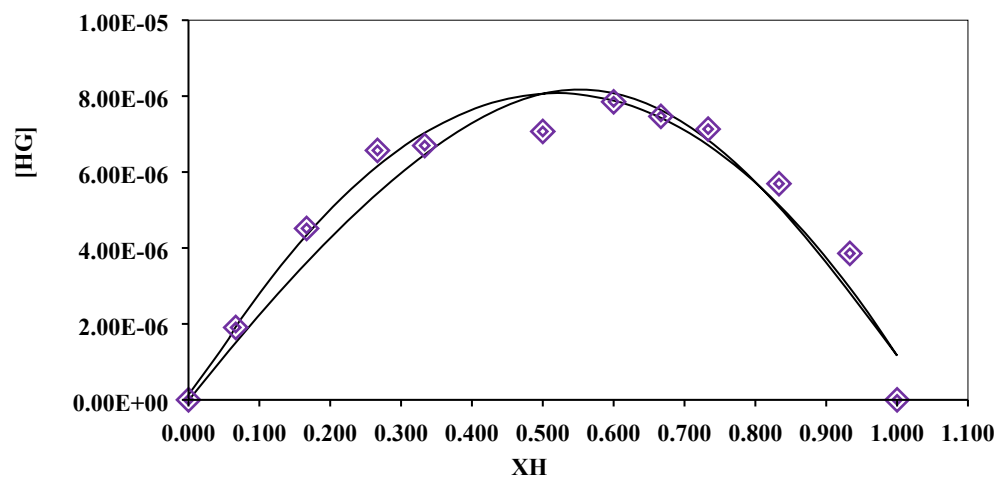

**Figure S11** Job plots for titrations of receptor **1** with different concentrations of  $\text{Hg}^{2+}$  metal salt

## Figure S12 Docking Procedure

### Protein structure preparation

The X-ray crystallographic structure of Aldose Reductase Inhibitors (ARIs) protein (PDB code 1US0) was obtained from Brookhaven Protein Data Bank (RCSB) (<http://www.rcsb.org/pdb>).

For docking studies, all water molecules and IDD594 were removed from the complex.

### Ligand Preparation

Receptor **1** structure was drawn using Chem Office 8.0. Chem3D Ultra 8.0 was used to convert 2D structure into 3D and energy minimization is carried out using MM2 force field. All ligand structures were saved as pdb file format for input to docking.

### 3.3 Docking Parameters

| Docking Control |                  |                        |
|-----------------|------------------|------------------------|
| 1               | Correlation type | Shape + Electrostatics |
| 2               | FFT mode         | 3DFast Lite            |
| 3               | Post processing  | MM Minimization        |
| 4               | Grid Dimension   | 0.6                    |
| 5               | Solution         | 500                    |
| 6               | Ligand range     | 180                    |
| 7               | Step size        | 7.5                    |
| 8               | Twist Range      | 360                    |
| 9               | Step size        | 5.5                    |
| 10              | Distance Range   | 40                     |
| 11              | Scan step        | 0.75                   |
| 12              | Sub Step         | 2.0                    |
| 13              | Steric Scan      | 25                     |
| 14              | Final Search     | 25                     |
| 15              | Solution         | 0                      |

**Figure S13** Crystal Data

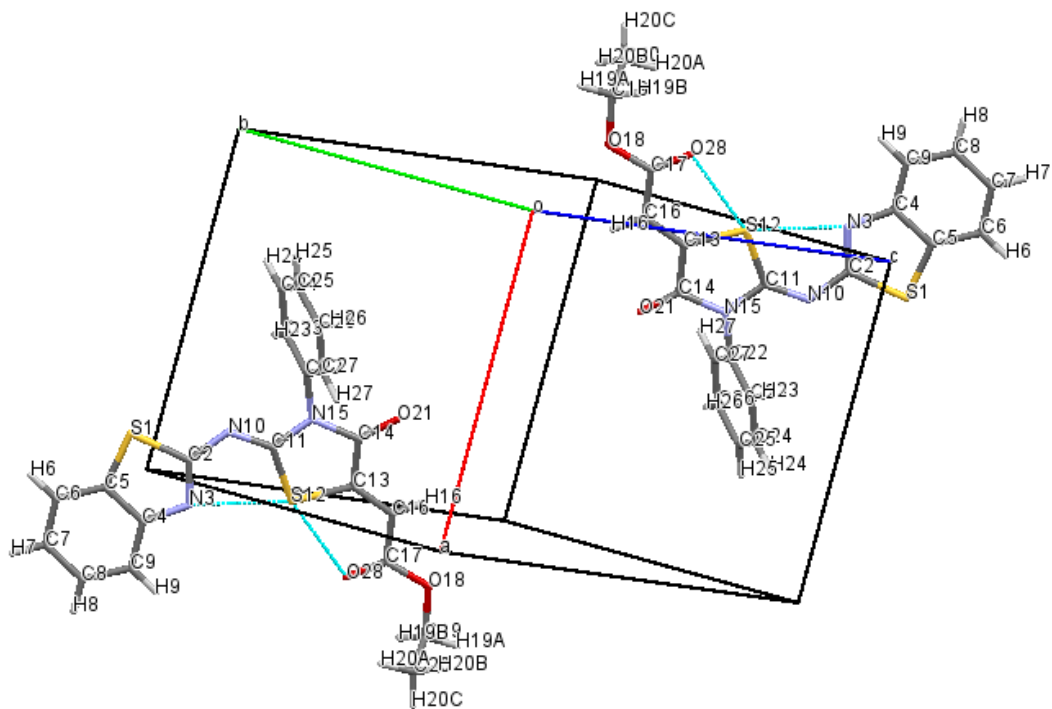

The molecular packing diagram of the **1**, viewed along the  $b^*$ -axis. Dashed lines indicate the hydrogen-bonding interactions

**Table 1.** Crystallographic details for **1**

|                      |                                                                              |                             |
|----------------------|------------------------------------------------------------------------------|-----------------------------|
| Formula              | C <sub>20</sub> H <sub>15</sub> N <sub>3</sub> O <sub>3</sub> S <sub>2</sub> |                             |
| Formula weight       | 409.47                                                                       |                             |
| Temperature          | 150(2) K                                                                     |                             |
| Wavelength           | 0.71073 Å                                                                    |                             |
| Crystal system       | Triclinic                                                                    |                             |
| Space group          | $P\bar{1}$                                                                   |                             |
| Unit cell dimensions | a = 10.2244(2) Å                                                             | $\alpha = 117.291(1)^\circ$ |
|                      | b = 10.6450(2) Å                                                             | $\beta = 104.012(1)^\circ$  |
|                      | c = 10.7022(2) Å                                                             | $\gamma = 102.864(1)^\circ$ |
| Volume               | 926.11(3) Å <sup>3</sup>                                                     |                             |
| Z                    | 2                                                                            |                             |
| Density (calculated) | 1.468 Mg/m <sup>3</sup>                                                      |                             |

|                                   |                                             |
|-----------------------------------|---------------------------------------------|
| Absorption coefficient            | 0.315 mm <sup>-1</sup>                      |
| F(000)                            | 424                                         |
| Crystal size                      | 0.15 x 0.19 x 0.27 mm <sup>3</sup>          |
| Theta range for data collection   | 2.226 to 27.459°                            |
| Index ranges                      | -13<=h<=13, -13<=k<=13, -13<=l<=13          |
| Reflections collected             | 28487                                       |
| Independent reflections           | 4233 [R(int) = 0.039]                       |
| Completeness to theta = 25.242°   | 100.0 %                                     |
| Refinement method                 | Full-matrix least-squares on F <sup>2</sup> |
| Data / restraints / parameters    | 4233 / 0 / 254                              |
| Goodness-of-fit on F <sup>2</sup> | 1.038                                       |
| Final R indices [I>2sigma(I)]     | R1 = 0.0352, wR2 = 0.0801                   |
| R indices (all data)              | R1 = 0.0558, wR2 = 0.0892                   |
| Largest diff. peak and hole       | 0.302 and -0.260 e/Å <sup>3</sup>           |

**Table 2.** Atomic coordinates ( x 10<sup>4</sup>) and equivalent isotropic displacement parameters (Å<sup>2</sup>x 10<sup>3</sup>) for **1**. U(eq) is defined as one third of the trace of the orthogonalized U<sup>ij</sup> tensor.

|       | x        | y        | z        | U(eq) |
|-------|----------|----------|----------|-------|
| C(2)  | 9250(2)  | 7223(2)  | 8702(2)  | 22(1) |
| C(4)  | 11364(2) | 8979(2)  | 9407(2)  | 23(1) |
| C(5)  | 10550(2) | 8985(2)  | 8145(2)  | 25(1) |
| C(6)  | 11181(2) | 9960(2)  | 7739(2)  | 29(1) |
| C(7)  | 12637(2) | 10930(2) | 8605(2)  | 30(1) |
| C(8)  | 13459(2) | 10909(2) | 9834(2)  | 32(1) |
| C(9)  | 12839(2) | 9944(2)  | 10242(2) | 31(1) |
| C(11) | 8388(2)  | 5845(2)  | 9678(2)  | 21(1) |
| C(13) | 9145(2)  | 5601(2)  | 11941(2) | 22(1) |
| C(14) | 7652(2)  | 4471(2)  | 10773(2) | 22(1) |
| C(16) | 9761(2)  | 5611(2)  | 13203(2) | 24(1) |
| C(17) | 11261(2) | 6693(2)  | 14298(2) | 24(1) |
| C(19) | 13286(2) | 7350(2)  | 16454(2) | 30(1) |
| C(20) | 14248(2) | 6632(2)  | 15779(2) | 37(1) |

|       |          |         |          |       |
|-------|----------|---------|----------|-------|
| C(22) | 5935(2)  | 3707(2) | 8250(2)  | 22(1) |
| C(23) | 4950(2)  | 4329(2) | 7930(2)  | 26(1) |
| C(24) | 3621(2)  | 3367(2) | 6676(2)  | 33(1) |
| C(25) | 3292(2)  | 1810(2) | 5784(2)  | 34(1) |
| C(26) | 4287(2)  | 1204(2) | 6125(2)  | 33(1) |
| C(27) | 5629(2)  | 2157(2) | 7357(2)  | 27(1) |
| N(3)  | 10592(1) | 7975(2) | 9700(2)  | 25(1) |
| N(10) | 8161(1)  | 6095(2) | 8601(2)  | 23(1) |
| N(15) | 7308(1)  | 4684(2) | 9566(1)  | 21(1) |
| O(18) | 11749(1) | 6431(1) | 15395(1) | 28(1) |
| O(21) | 6843(1)  | 3515(1) | 10852(1) | 27(1) |
| O(28) | 11967(1) | 7690(1) | 14185(1) | 32(1) |
| S(1)  | 8775(1)  | 7648(1) | 7301(1)  | 30(1) |
| S(12) | 9953(1)  | 6802(1) | 11411(1) | 23(1) |

---

**Table 3.** Bond lengths [ $\text{\AA}$ ] and angles [ $^\circ$ ] for **1**.

---

|             |            |
|-------------|------------|
| C(2)-N(3)   | 1.297(2)   |
| C(2)-N(10)  | 1.385(2)   |
| C(2)-S(1)   | 1.7483(16) |
| C(4)-N(3)   | 1.383(2)   |
| C(4)-C(9)   | 1.394(2)   |
| C(4)-C(5)   | 1.409(2)   |
| C(5)-C(6)   | 1.391(2)   |
| C(5)-S(1)   | 1.7358(17) |
| C(6)-C(7)   | 1.383(2)   |
| C(6)-H(6)   | 0.9500     |
| C(7)-C(8)   | 1.391(3)   |
| C(7)-H(7)   | 0.9500     |
| C(8)-C(9)   | 1.379(2)   |
| C(8)-H(8)   | 0.9500     |
| C(9)-H(9)   | 0.9500     |
| C(11)-N(10) | 1.278(2)   |
| C(11)-N(15) | 1.398(2)   |
| C(11)-S(12) | 1.7721(16) |

|                 |            |
|-----------------|------------|
| C(13)-C(16)     | 1.339(2)   |
| C(13)-C(14)     | 1.490(2)   |
| C(13)-S(12)     | 1.7499(16) |
| C(14)-O(21)     | 1.2105(19) |
| C(14)-N(15)     | 1.388(2)   |
| C(16)-C(17)     | 1.469(2)   |
| C(16)-H(16)     | 0.9500     |
| C(17)-O(28)     | 1.2166(19) |
| C(17)-O(18)     | 1.3351(19) |
| C(19)-O(18)     | 1.4652(19) |
| C(19)-C(20)     | 1.499(3)   |
| C(19)-H(19A)    | 0.9900     |
| C(19)-H(19B)    | 0.9900     |
| C(20)-H(20A)    | 0.9800     |
| C(20)-H(20B)    | 0.9800     |
| C(20)-H(20C)    | 0.9800     |
| C(22)-C(23)     | 1.382(2)   |
| C(22)-C(27)     | 1.384(2)   |
| C(22)-N(15)     | 1.4444(19) |
| C(23)-C(24)     | 1.391(2)   |
| C(23)-H(23)     | 0.9500     |
| C(24)-C(25)     | 1.385(3)   |
| C(24)-H(24)     | 0.9500     |
| C(25)-C(26)     | 1.383(3)   |
| C(25)-H(25)     | 0.9500     |
| C(26)-C(27)     | 1.388(2)   |
| C(26)-H(26)     | 0.9500     |
| C(27)-H(27)     | 0.9500     |
|                 |            |
| N(3)-C(2)-N(10) | 127.27(14) |
| N(3)-C(2)-S(1)  | 116.28(12) |
| N(10)-C(2)-S(1) | 116.43(11) |
| N(3)-C(4)-C(9)  | 125.61(15) |
| N(3)-C(4)-C(5)  | 115.13(14) |
| C(9)-C(4)-C(5)  | 119.26(15) |
| C(6)-C(5)-C(4)  | 121.24(15) |

|                     |            |
|---------------------|------------|
| C(6)-C(5)-S(1)      | 129.51(13) |
| C(4)-C(5)-S(1)      | 109.25(12) |
| C(7)-C(6)-C(5)      | 118.35(16) |
| C(7)-C(6)-H(6)      | 120.8      |
| C(5)-C(6)-H(6)      | 120.8      |
| C(6)-C(7)-C(8)      | 120.83(16) |
| C(6)-C(7)-H(7)      | 119.6      |
| C(8)-C(7)-H(7)      | 119.6      |
| C(9)-C(8)-C(7)      | 121.07(16) |
| C(9)-C(8)-H(8)      | 119.5      |
| C(7)-C(8)-H(8)      | 119.5      |
| C(8)-C(9)-C(4)      | 119.22(16) |
| C(8)-C(9)-H(9)      | 120.4      |
| C(4)-C(9)-H(9)      | 120.4      |
| N(10)-C(11)-N(15)   | 119.77(14) |
| N(10)-C(11)-S(12)   | 128.70(12) |
| N(15)-C(11)-S(12)   | 111.53(11) |
| C(16)-C(13)-C(14)   | 121.73(14) |
| C(16)-C(13)-S(12)   | 126.30(12) |
| C(14)-C(13)-S(12)   | 111.93(11) |
| O(21)-C(14)-N(15)   | 124.45(14) |
| O(21)-C(14)-C(13)   | 125.93(15) |
| N(15)-C(14)-C(13)   | 109.62(13) |
| C(13)-C(16)-C(17)   | 120.44(15) |
| C(13)-C(16)-H(16)   | 119.8      |
| C(17)-C(16)-H(16)   | 119.8      |
| O(28)-C(17)-O(18)   | 124.86(15) |
| O(28)-C(17)-C(16)   | 122.99(15) |
| O(18)-C(17)-C(16)   | 112.14(14) |
| O(18)-C(19)-C(20)   | 110.17(14) |
| O(18)-C(19)-H(19A)  | 109.6      |
| C(20)-C(19)-H(19A)  | 109.6      |
| O(18)-C(19)-H(19B)  | 109.6      |
| C(20)-C(19)-H(19B)  | 109.6      |
| H(19A)-C(19)-H(19B) | 108.1      |
| C(19)-C(20)-H(20A)  | 109.5      |



|                     |            |
|---------------------|------------|
| C(19)-C(20)-H(20B)  | 109.5      |
| H(20A)-C(20)-H(20B) | 109.5      |
| C(19)-C(20)-H(20C)  | 109.5      |
| H(20A)-C(20)-H(20C) | 109.5      |
| H(20B)-C(20)-H(20C) | 109.5      |
| C(23)-C(22)-C(27)   | 121.66(15) |
| C(23)-C(22)-N(15)   | 119.64(14) |
| C(27)-C(22)-N(15)   | 118.69(14) |
| C(22)-C(23)-C(24)   | 118.87(16) |
| C(22)-C(23)-H(23)   | 120.6      |
| C(24)-C(23)-H(23)   | 120.6      |
| C(25)-C(24)-C(23)   | 120.09(17) |
| C(25)-C(24)-H(24)   | 120.0      |
| C(23)-C(24)-H(24)   | 120.0      |
| C(26)-C(25)-C(24)   | 120.30(16) |
| C(26)-C(25)-H(25)   | 119.9      |
| C(24)-C(25)-H(25)   | 119.9      |
| C(25)-C(26)-C(27)   | 120.18(17) |
| C(25)-C(26)-H(26)   | 119.9      |
| C(27)-C(26)-H(26)   | 119.9      |
| C(22)-C(27)-C(26)   | 118.89(16) |
| C(22)-C(27)-H(27)   | 120.6      |
| C(26)-C(27)-H(27)   | 120.6      |
| C(2)-N(3)-C(4)      | 110.54(13) |
| C(11)-N(10)-C(2)    | 119.47(14) |
| C(14)-N(15)-C(11)   | 116.10(13) |
| C(14)-N(15)-C(22)   | 121.15(13) |
| C(11)-N(15)-C(22)   | 122.70(13) |
| C(17)-O(18)-C(19)   | 116.24(13) |
| C(5)-S(1)-C(2)      | 88.78(8)   |
| C(13)-S(12)-C(11)   | 90.80(7)   |

---

**Table 4.** Anisotropic displacement parameters ( $\text{\AA}^2 \times 10^3$ ) for **1**. The anisotropic displacement factor exponent takes the form:  $-2\pi^2 [ h^2 a^{*2} U^{11} + \dots + 2 h k a^* b^* U^{12} ]$

|       | U <sup>11</sup> | U <sup>22</sup> | U <sup>33</sup> | U <sup>23</sup> | U <sup>13</sup> | U <sup>12</sup> |
|-------|-----------------|-----------------|-----------------|-----------------|-----------------|-----------------|
| C(2)  | 22(1)           | 19(1)           | 23(1)           | 11(1)           | 8(1)            | 5(1)            |
| C(4)  | 24(1)           | 20(1)           | 24(1)           | 11(1)           | 9(1)            | 6(1)            |
| C(5)  | 25(1)           | 23(1)           | 25(1)           | 12(1)           | 10(1)           | 9(1)            |
| C(6)  | 32(1)           | 30(1)           | 32(1)           | 21(1)           | 13(1)           | 11(1)           |
| C(7)  | 35(1)           | 25(1)           | 35(1)           | 19(1)           | 20(1)           | 10(1)           |
| C(8)  | 26(1)           | 26(1)           | 35(1)           | 15(1)           | 11(1)           | 0(1)            |
| C(9)  | 26(1)           | 30(1)           | 27(1)           | 16(1)           | 4(1)            | 1(1)            |
| C(11) | 16(1)           | 16(1)           | 26(1)           | 9(1)            | 8(1)            | 3(1)            |
| C(13) | 17(1)           | 18(1)           | 26(1)           | 10(1)           | 8(1)            | 5(1)            |
| C(14) | 17(1)           | 21(1)           | 27(1)           | 13(1)           | 9(1)            | 7(1)            |
| C(16) | 21(1)           | 24(1)           | 29(1)           | 15(1)           | 11(1)           | 6(1)            |
| C(17) | 23(1)           | 24(1)           | 24(1)           | 14(1)           | 9(1)            | 7(1)            |
| C(19) | 22(1)           | 33(1)           | 23(1)           | 14(1)           | 2(1)            | 1(1)            |
| C(20) | 25(1)           | 42(1)           | 36(1)           | 20(1)           | 7(1)            | 7(1)            |
| C(22) | 16(1)           | 24(1)           | 21(1)           | 12(1)           | 7(1)            | 2(1)            |
| C(23) | 23(1)           | 27(1)           | 26(1)           | 14(1)           | 9(1)            | 8(1)            |
| C(24) | 21(1)           | 47(1)           | 31(1)           | 23(1)           | 9(1)            | 11(1)           |
| C(25) | 20(1)           | 42(1)           | 23(1)           | 14(1)           | 4(1)            | -3(1)           |
| C(26) | 31(1)           | 26(1)           | 28(1)           | 10(1)           | 11(1)           | -2(1)           |
| C(27) | 23(1)           | 26(1)           | 31(1)           | 16(1)           | 12(1)           | 5(1)            |
| N(3)  | 23(1)           | 24(1)           | 25(1)           | 15(1)           | 7(1)            | 2(1)            |
| N(10) | 20(1)           | 22(1)           | 25(1)           | 14(1)           | 8(1)            | 4(1)            |
| N(15) | 15(1)           | 20(1)           | 24(1)           | 12(1)           | 5(1)            | 2(1)            |
| O(18) | 20(1)           | 32(1)           | 26(1)           | 17(1)           | 4(1)            | 2(1)            |
| O(21) | 20(1)           | 28(1)           | 33(1)           | 20(1)           | 8(1)            | 2(1)            |
| O(28) | 26(1)           | 28(1)           | 31(1)           | 18(1)           | 2(1)            | 0(1)            |
| S(1)  | 22(1)           | 33(1)           | 31(1)           | 22(1)           | 5(1)            | 4(1)            |
| S(12) | 18(1)           | 20(1)           | 24(1)           | 12(1)           | 5(1)            | 2(1)            |

**Table 5.** Calculated hydrogen coordinates ( $\times 10^4$ ) and isotropic displacement parameters ( $\text{\AA}^2 \times 10^3$ ) for **1**

|        | x     | y     | z     | U(eq) |
|--------|-------|-------|-------|-------|
| H(6)   | 10625 | 9960  | 6887  | 35    |
| H(7)   | 13082 | 11618 | 8357  | 35    |
| H(8)   | 14463 | 11571 | 10401 | 38    |
| H(9)   | 13411 | 9937  | 11081 | 37    |
| H(16)  | 9225  | 4913  | 13391 | 29    |
| H(19A) | 13429 | 7424  | 17438 | 36    |
| H(19B) | 13555 | 8400  | 16662 | 36    |
| H(20A) | 14151 | 6621  | 14840 | 56    |
| H(20B) | 13954 | 5579  | 15538 | 56    |
| H(20C) | 15267 | 7227  | 16518 | 56    |
| H(23)  | 5176  | 5396  | 8557  | 32    |
| H(24)  | 2937  | 3779  | 6430  | 39    |
| H(25)  | 2379  | 1155  | 4934  | 41    |
| H(26)  | 4052  | 134   | 5514  | 40    |
| H(27)  | 6326  | 1750  | 7583  | 32    |

**Table 6.** Torsion angles [ $^\circ$ ] for **1**.

|                         |             |
|-------------------------|-------------|
| N(3)-C(4)-C(5)-C(6)     | 178.77(15)  |
| C(9)-C(4)-C(5)-C(6)     | -1.5(2)     |
| N(3)-C(4)-C(5)-S(1)     | -1.27(18)   |
| C(9)-C(4)-C(5)-S(1)     | 178.45(13)  |
| C(4)-C(5)-C(6)-C(7)     | 0.1(3)      |
| S(1)-C(5)-C(6)-C(7)     | -179.83(13) |
| C(5)-C(6)-C(7)-C(8)     | 1.2(3)      |
| C(6)-C(7)-C(8)-C(9)     | -1.2(3)     |
| C(7)-C(8)-C(9)-C(4)     | -0.2(3)     |
| N(3)-C(4)-C(9)-C(8)     | -178.78(16) |
| C(5)-C(4)-C(9)-C(8)     | 1.5(3)      |
| C(16)-C(13)-C(14)-O(21) | 2.8(3)      |
| S(12)-C(13)-C(14)-O(21) | -179.29(13) |

|                         |             |
|-------------------------|-------------|
| C(16)-C(13)-C(14)-N(15) | -177.86(14) |
| S(12)-C(13)-C(14)-N(15) | 0.06(16)    |
| C(14)-C(13)-C(16)-C(17) | 177.13(14)  |
| S(12)-C(13)-C(16)-C(17) | -0.5(2)     |
| C(13)-C(16)-C(17)-O(28) | 5.7(3)      |
| C(13)-C(16)-C(17)-O(28) | -173.27(14) |
| C(27)-C(22)-C(23)-C(24) | -0.1(2)     |
| N(15)-C(22)-C(23)-C(24) | -178.81(14) |
| C(22)-C(23)-C(24)-C(25) | 1.0(2)      |
| C(23)-C(24)-C(25)-C(26) | -0.7(3)     |
| C(24)-C(25)-C(26)-C(27) | -0.6(3)     |
| C(23)-C(22)-C(27)-C(26) | -1.1(2)     |
| N(15)-C(22)-C(27)-C(26) | 177.62(14)  |
| C(25)-C(26)-C(27)-C(22) | 1.4(2)      |
| N(10)-C(2)-N(3)-C(4)    | 178.32(15)  |
| S(1)-C(2)-N(3)-C(4)     | 0.03(18)    |
| C(9)-C(4)-N(3)-C(2)     | -178.88(16) |
| C(5)-C(4)-N(3)-C(2)     | 0.8(2)      |
| N(15)-C(11)-N(10)-C(2)  | -178.45(13) |
| S(12)-C(11)-N(10)-C(2)  | 1.9(2)      |
| N(3)-C(2)-N(10)-C(11)   | 9.2(2)      |
| S(1)-C(2)-N(10)-C(11)   | -172.55(12) |
| O(21)-C(14)-N(15)-C(11) | -179.83(15) |
| C(13)-C(14)-N(15)-C(11) | 0.80(19)    |
| O(21)-C(14)-N(15)-C(22) | -2.4(2)     |
| C(13)-C(14)-N(15)-C(22) | 178.22(13)  |
| N(10)-C(11)-N(15)-C(14) | 178.96(14)  |
| S(12)-C(11)-N(15)-C(14) | -1.31(17)   |
| N(10)-C(11)-N(15)-C(22) | 1.6(2)      |
| S(12)-C(11)-N(15)-C(22) | -178.68(11) |
| C(23)-C(22)-N(15)-C(14) | 116.76(17)  |
| C(27)-C(22)-N(15)-C(14) | -62.0(2)    |
| C(23)-C(22)-N(15)-C(11) | -66.0(2)    |
| C(27)-C(22)-N(15)-C(11) | 115.25(17)  |
| O(28)-C(17)-O(18)-C(19) | -4.9(2)     |
| C(16)-C(17)-O(18)-C(19) | 174.04(13)  |

|                         |             |
|-------------------------|-------------|
| C(20)-C(19)-O(18)-C(17) | -84.01(18)  |
| C(6)-C(5)-S(1)-C(2)     | -179.02(17) |
| C(4)-C(5)-S(1)-C(2)     | 1.01(12)    |
| N(3)-C(2)-S(1)-C(5)     | -0.64(13)   |
| N(10)-C(2)-S(1)-C(5)    | -179.12(13) |
| C(16)-C(13)-S(12)-C(11) | 177.16(15)  |
| C(14)-C(13)-S(12)-C(11) | -0.65(12)   |
| N(10)-C(11)-S(12)-C(13) | -179.21(16) |
| N(15)-C(11)-S(12)-C(13) | 1.09(12)    |

---

**Table 7.** Hydrogen bonds for **1** [ $\text{\AA}$  and  $^\circ$ ]

| D-H...A                | d(D-H) | d(H...A) | d(D...A) | $\angle$ (DHA) |
|------------------------|--------|----------|----------|----------------|
| C(16)-H(16)...O(18)#1  | 0.95   | 2.53     | 3.461(2) | 165.1          |
| C(19)-H(19A)...O(21)#1 | 0.99   | 2.49     | 3.426(2) | 156.6          |
| C(23)-H(23)...O(21)#2  | 0.95   | 2.65     | 3.257(2) | 122.1          |

---

Symmetry transformations used to generate equivalent atoms:

#1  $-x+2, -y+1, -z+3$  #2  $-x+1, -y+1, -z+2$

**Table 8.** A comparison of literature reported solvent with present methodology

| <b>Group</b>       | <b>Synthetic strategy</b>                         | <b>Detection limit</b>                   | <b>Fluorescence response</b> | <b>Solvent</b>  | <b>Ref.</b> |
|--------------------|---------------------------------------------------|------------------------------------------|------------------------------|-----------------|-------------|
| Kaur <i>et al.</i> | Bis(N-methylindolyl)methane-based chemical probes | Cu = 0.12 $\mu$ M<br>Hg = 9.96 $\mu$ M   | quenching                    | Acetonitrile    | 24a         |
| Kaur <i>et al.</i> | Indole-Based Chemosensor                          | Cu = 1.67 $\mu$ M,<br>Hg = 1.21 $\mu$ M, | quenching                    | Acetonitrile    | 24b         |
| Present work       | Regioselective benzothiazole based receptor       | Cu = 0.36 $\mu$ M<br>Hg = 2.49 $\mu$ M   | quenching                    | Aq.<br>Methanol | This work   |
